# Supplementary material for: m6A demethylase FTO induces NELL2 expression by inhibiting E2F1 m6A modification leading to metastasis of non-small cell lung cancer
Source: PubMed Central journal article supplement — Mol Ther Oncolytics. 2021 Apr 29;21:367–76. doi: 10.1016/j.omto.2021.04.011 (PMC8190133; doi:10.1016/j.omto.2021.04.011), 2021-04-29
Supplement: mmc1.pdf [file mmc1.pdf]

**OMTO, Volume 21**

**Supplemental information**

**m6A demethylase FTO induces NELL2 expression  
by inhibiting E2F1 m6A modification leading  
to metastasis of non-small cell lung cancer**

**Yanyun Wang, Man Li, Lin Zhang, Yitong Chen, and Shoudan Zhang**

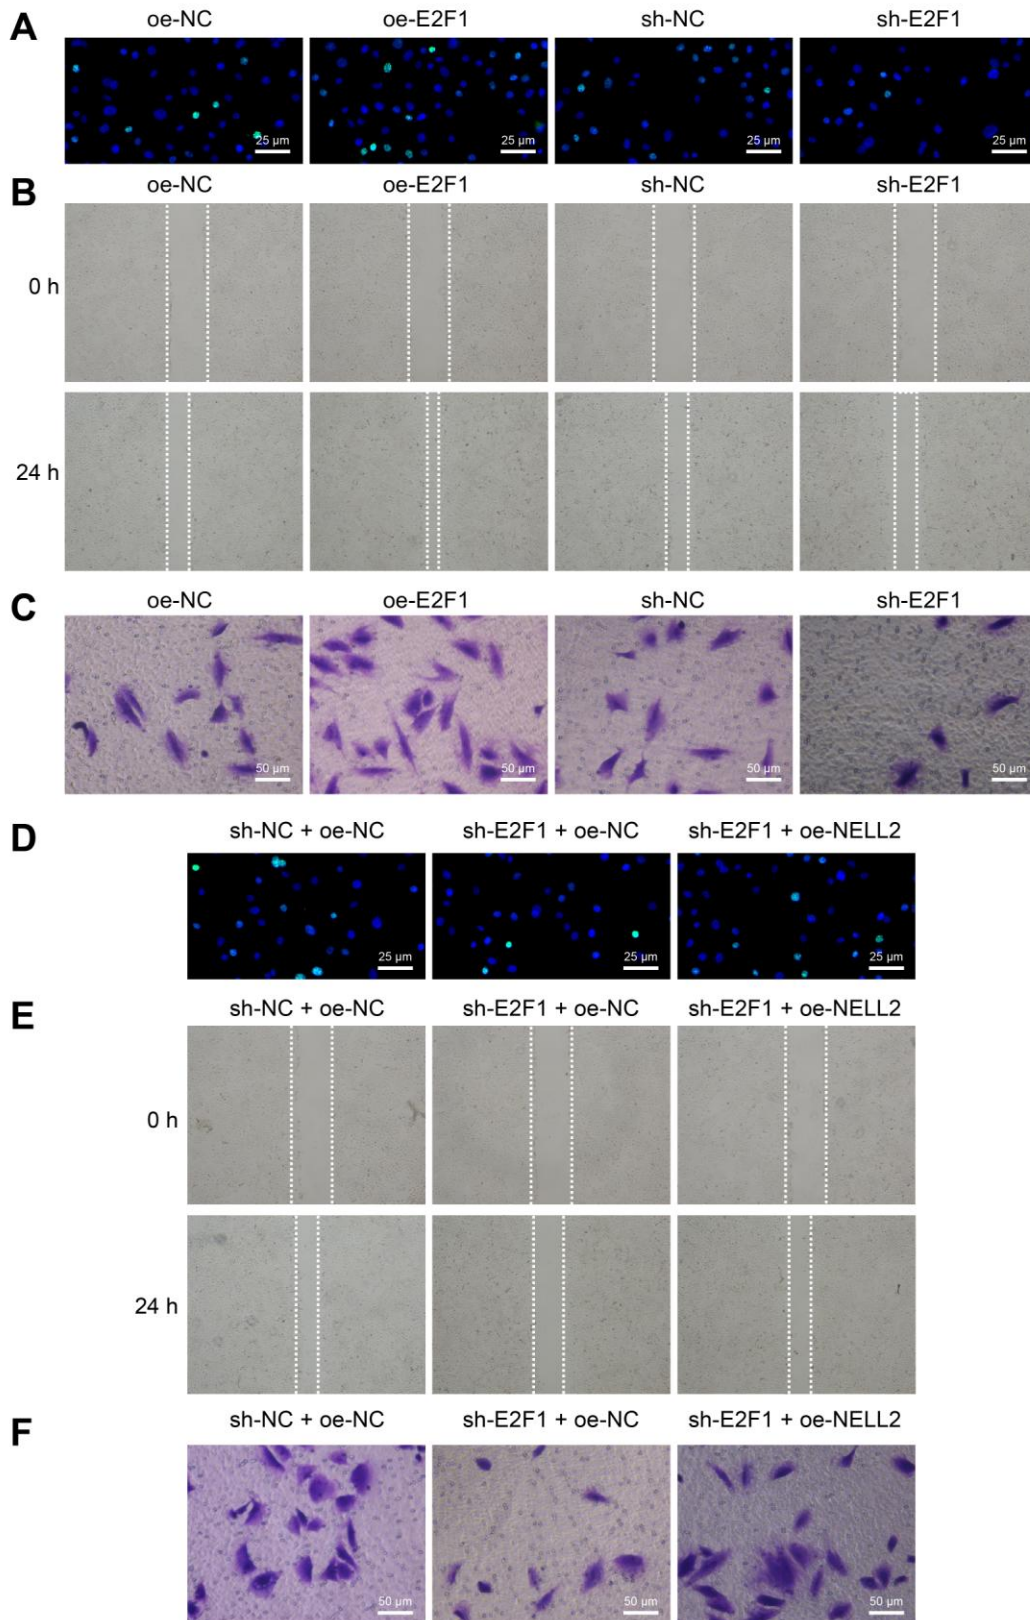

**Supplementary Figure 1** Representative images of EdU staining, wound healing, and Transwell assays. A: Representative images of EdU staining to detect A549 cell viability in response to overexpression or silencing of E2F1; B: Representative images of wound healing assay to detect the migration of A549 cells in response to overexpression or silencing of E2F1; C Representative

images of Transwell assay to evaluate A549 cell invasion in response to overexpression or silencing of E2F1; D: Representative images of EdU staining to detect the viability of A549 cells in response to the combination of E2F1 silencing and NELL2 overexpression; E: Representative images of wound healing assay to detect the migration of A549 cells in response to the combination of E2F1 silencing and NELL2 overexpression; F: Representative images of Transwell assay to assess the invasion of A549 cells in response to the combination of E2F1 silencing and NELL2 overexpression.

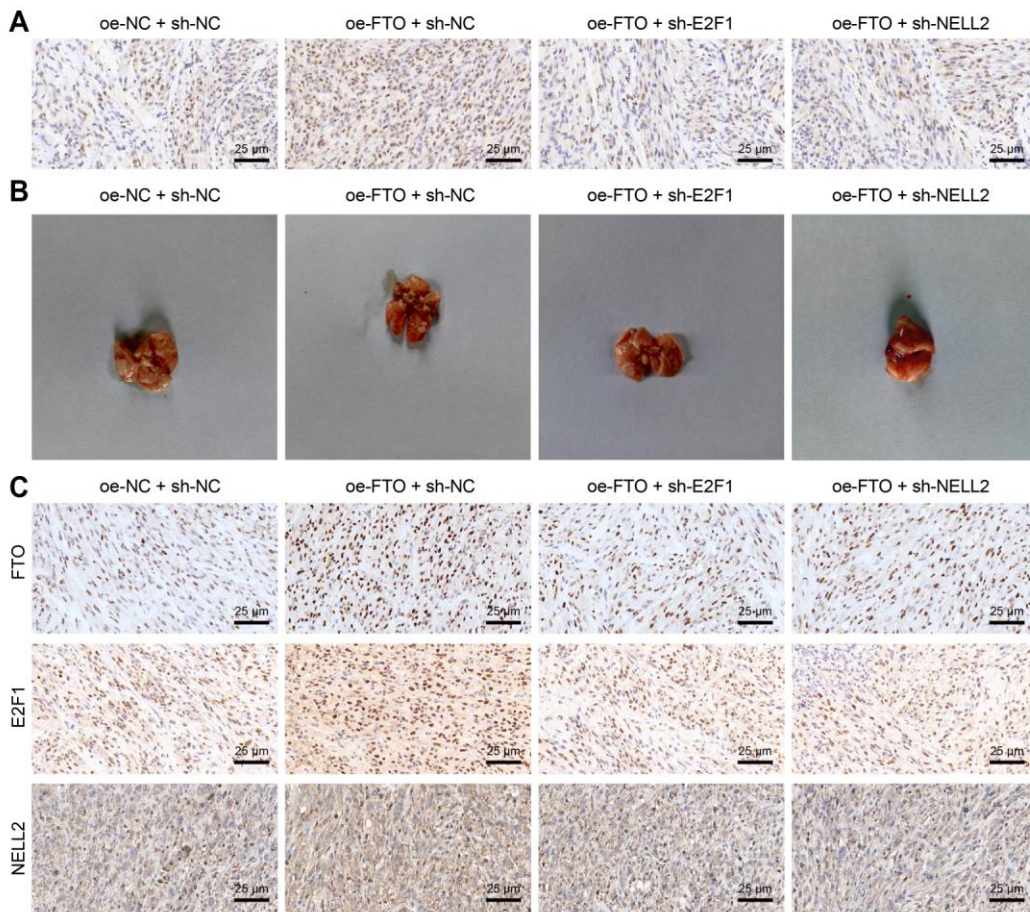

**Supplementary Figure 2** Representative images of *in vivo* experiments. A: Representative images of immunohistochemical staining to measure the expression of Ki-67 in the lung tumor tissues of nude mice in response to FTO overexpression alone or its combination with E2F1/NELL2 knockdown; B: Representative images of fluorescence imaging to observe the distribution of extrahepatic metastases in nude mice; C Representative images of immunohistochemical detection of FTO, E2F1 and NELL2 protein positive rates in xenografted tumor tissues.

**Supplementary table 1 Bioinformatics analysis for the binding of E2F1 to the promoter of NELL2**

| TF   | Pattern name     | Source    | Sequence name | Start | Stop | Strand | Score   | P.value  | Q.value  | Matched motif    |
|------|------------------|-----------|---------------|-------|------|--------|---------|----------|----------|------------------|
| E2F1 |                  | database  | NELL2         | 1857  | 1870 | +      | 11.1613 | 6.24E-05 | 0.19     | AGAGGGAGGGAGAA   |
| E2F1 |                  | database  | NELL2         | 1352  | 1365 | +      | 10.4919 | 9.97E-05 | 0.19     | AGGGGGCGCGCGGG   |
| E2F1 | m-dataset-801-1  | hTFtarget | NELL2         | 1350  | 1365 | +      | 18.2273 | 4.78E-08 | 0.000182 | GCAGGGGGCGCGCGGG |
| E2F1 | m-dataset-803-3  | hTFtarget | NELL2         | 1449  | 1460 | -      | 19.1974 | 2.00E-07 | 0.000775 | GGGGCGGGGCGC     |
| E2F1 | m-dataset-801-1  | hTFtarget | NELL2         | 1444  | 1459 | -      | 13.1212 | 1.68E-05 | 0.0244   | GGGCGGGGCGCTGGAG |
| E2F1 | m-dataset-803-3  | hTFtarget | NELL2         | 1968  | 1979 | -      | 11.9737 | 1.80E-05 | 0.035    | AGGGAGGGGCCG     |
| E2F1 | m-dataset-801-1  | hTFtarget | NELL2         | 1449  | 1464 | -      | 12.9545 | 1.92E-05 | 0.0244   | GCCGGGGGCGGGGCGC |
| E2F1 | m-dataset-803-3  | hTFtarget | NELL2         | 1541  | 1552 | -      | 10.6842 | 3.10E-05 | 0.0402   | GAGGTGGAGCTG     |
| E2F1 | m-dataset-803-1  | hTFtarget | NELL2         | 1449  | 1460 | -      | 12.3857 | 3.33E-05 | 0.126    | GGGGCGGGGCGC     |
| E2F1 | m-dataset-801-1  | hTFtarget | NELL2         | 1162  | 1177 | -      | 11.9848 | 3.92E-05 | 0.0373   | GGAGATGGAGCCCAGG |
| E2F1 | m-dataset-804-2  | hTFtarget | NELL2         | 1581  | 1592 | +      | 10.8158 | 4.16E-05 | 0.163    | CTCCGCACGCC      |
| E2F1 | m-dataset-804-1  | hTFtarget | NELL2         | 1412  | 1424 | -      | 10.7143 | 4.86E-05 | 0.187    | GCTTCCCGGGCGC    |
| E2F1 | m-dataset-801-1  | hTFtarget | NELL2         | 1407  | 1422 | -      | 11.6061 | 5.09E-05 | 0.0388   | TTCCGGGCGCGGAGA  |
| E2F1 | m-dataset-801-1  | hTFtarget | NELL2         | 1985  | 2000 | -      | 11.303  | 6.25E-05 | 0.0397   | GGGGGAGGCGGGGTAA |
| E2F1 | m-dataset-1573-1 | hTFtarget | NELL2         | 1655  | 1663 | -      | 10.8421 | 7.50E-05 | 0.125    | GGAGGGAAG        |
| E2F1 | m-dataset-805-1  | hTFtarget | NELL2         | 1655  | 1663 | -      | 10.8421 | 7.50E-05 | 0.126    | GGAGGGAAG        |
| E2F1 | m-dataset-803-1  | hTFtarget | NELL2         | 1407  | 1418 | -      | 10.3714 | 8.10E-05 | 0.154    | CGGGCGCGGAGA     |
| E2F1 | m-dataset-1573-1 | hTFtarget | NELL2         | 1861  | 1869 | +      | 10.7237 | 8.55E-05 | 0.125    | GGAGGGAGA        |
| E2F1 | m-dataset-805-1  | hTFtarget | NELL2         | 1861  | 1869 | +      | 10.7237 | 8.55E-05 | 0.126    | GGAGGGAGA        |
| E2F1 | m-dataset-801-1  | hTFtarget | NELL2         | 1352  | 1367 | +      | 10.7121 | 9.03E-05 | 0.0454   | AGGGGGCGCGCGGGTT |
| E2F1 | m-dataset-801-1  | hTFtarget | NELL2         | 1968  | 1983 | -      | 10.6212 | 9.53E-05 | 0.0454   | GAGGAGGGAGGGGCCG |
| E2F1 | m-dataset-803-4  | hTFtarget | NELL2         | 501   | 507  | +      | 10.4286 | 9.66E-05 | 0.378    | TTTCAA           |
| E2F1 | m-dataset-1573-1 | hTFtarget | NELL2         | 1973  | 1981 | -      | 10.4342 | 9.80E-05 | 0.125    | GGAGGGAGG        |
| E2F1 | m-dataset-805-1  | hTFtarget | NELL2         | 1973  | 1981 | -      | 10.4342 | 9.80E-05 | 0.126    | GGAGGGAGG        |

**Supplementary table 2 Cell grouping and transfection**

| Groups           | Plasmids                                                                   |
|------------------|----------------------------------------------------------------------------|
| oe-NC            | NC overexpression plasmids                                                 |
| sh-NC            | Plasmids shutting NC shRNA                                                 |
| sh-FTO           | Plasmids shutting FTO-targeting shRNA                                      |
| oe-FTO           | FTO overexpression plasmids                                                |
| oe-E2F1          | E2F1 overexpression plasmids                                               |
| sh-E2F1          | Plasmids shutting E2F1-targeting shRNA                                     |
| sh-NC+oe-NC      | NC overexpression plasmids and plasmids shutting NC shRNA                  |
| sh-E2F1+oe-NC    | Plasmids shutting E2F1-targeting shRNA E2F1 and NC overexpression plasmids |
| sh-E2F1+oe-NELL2 | Plasmids shutting E2F1-targeting shRNA and NELL2 overexpression plasmids   |
| oe-FTO+sh-NC     | FTO overexpression plasmids and Plasmids shutting NC shRNA                 |
| oe-FTO+sh-E2F1   | FTO overexpression plasmids and plasmids shutting E2F1-targeting shRNA     |
| oe-FTO+sh-NELL2  | FTO overexpression plasmids and plasmids shutting NELL2-targeting shRNA    |

**Note:** FTO, fat mass and obesity-associated protein; E2F1, E2F transcription factor-1; NELL2, neural epidermal growth factor-like 2; NC, negative control

**Supplementary table 3 Primer sequences for qRT-PCR**

| Genes | Forward primers             | Reverse primers              |
|-------|-----------------------------|------------------------------|
| FTO   | 5'-ACTTGGCTCCCTTATCTGACC-3' | 5'-TGTGCAGTGTGAGAAAGGCTT-3'  |
| E2F1  | 5'-CCCATCCCAGGAGGTCACCTT-3' | 5'-CTGCAGGCTCACTGCTCTC-3'    |
| NELL2 | 5'-GGTAGCCGTCTCTGCACT CA-3' | 5'-TGTAGAAACGGAGCGTG-3'      |
| GUSB  | 5'-CTCATTGGAATTTTGCCGATT-3' | 5'-CCGAGTGAAGATCCCCTTTTTA-3' |

**Note:** FTO, fat mass and obesity-associated protein; E2F1, E2F transcription factor-1; NELL2, neural epidermal growth factor-like 2; GUSB, human functional  $\beta$ -glucuronidase gene
